# Supplementary material
Source: Elsevier journal article supplement (https://www.sciencedirect.com/science/article/pii/S1575092213003574)
Supplement: mmc1 [file S1575092213003574:mmc1.doc]

**ANEXO I**

| **Relación: Conocimiento de la calidad del desayuno / Variables relacionadas con el consumo de tóxicos** | | | | | | | | | | | | | | | |
| --- | --- | --- | --- | --- | --- | --- | --- | --- | --- | --- | --- | --- | --- | --- | --- |
|  | |  | | |  | |  | Conocimiento sobre calidad del desayuno | | | | | | |  |
| n |  | Nada saludable | | Poco saludable | | | Saludable | Muy saludable | *Media | **Dt | X2 | Estadístico | Correl.  Pearson |
| Fuma | Nunca | 1026 |  | 2,0% | | 12,0% | | | 35,8% | 50,2% | 2,34 | 0,87 | 0,092 | Anova  1 factor  p<0,05 | ***-0,08  p>0,01 |
| De vez en cuando | 93 | 3,2% | | 15,1% | | | 36,6% | 45,2% | 2,24 |
| A menudo | 16 |  | | 25,0% | | | 37,5% | 37,5% | 2,13 |
| Frecuentemente | 18 |  | | 33,3% | | | 22,2% | 44,4% | 2,11 |
| A diario | 44 | 4,5% | | 25,0% | | | 31,8% | 38,6% | 2,05 |
| Consume  Alcohol | Nunca | 639 |  | 2,3% | | 12,8% | | | 35,2% | 49,6% | 2,32 | 1,49 | 0,689 | Anova  1 factor  p>0,05 | -0,03  p>0,05 |
| Alguna vez en la vida | 283 | 1,8% | | 12,4% | | | 35,0% | 50,9% | 2,35 |
| En el último año | 80 | 2,5% | | 11,3% | | | 37,5% | 48,8% | 2,32 |
| En el último mes | 67 | 3,0% | | 19,4% | | | 35,8% | 41,8% | 2,16 |
| En las últimas dos semanas | 80 | 1,3% | | 8,8% | | | 38,8% | 51,3% | 2,40 |
| Semanalmente | 48 | 2,1% | | 25,0% | | | 33,3% | 39,6% | 2,10 |
| Consume  Drogas | Nunca | 1102 |  | 2,1% | | 12,6% | | | 36,0% | 49,3% | 2,32 | 0,74 | 0,242 | Anova  1 factor  p>0,05 | -0,02  p>0,05 |
| Alguna vez en la vida | 53 | 5,7% | | 17,0% | | | 34,0% | 43,4% | 2,15 |
| En el último año | 10 |  | | 30,0% | | | 10,0% | 60,0% | 2,30 |
| En el último mes | 6 |  | | 16,7% | | | 33,3% | 50,0% | 2,33 |
| En las últimas dos semanas | 10 |  | | 20,0% | | |  | 80,0% | 2,60 |
| Semanalmente | 16 |  | | 25,0% | | | 43,8% | 31,3% | 2,06 |

* La media se calcula dándole un valor a cada ítem del tipo de desayuno: 0 Nada saludable; 1 Poco saludable; 2 Saludable; 3 Muy saludable

** Dt: Desviación típica o estándar

*** La correlación es significativa al nivel 0,01

**ANEXO II**

|  | **Relación: Conocimiento de la calidad del desayuno / Variables relacionadas con el tiempo libre y de ocio** | | | | | | | | | | | | | | | | |
| --- | --- | --- | --- | --- | --- | --- | --- | --- | --- | --- | --- | --- | --- | --- | --- | --- | --- |
|  | | |  | | |  | |  | |  | Conocimiento sobre calidad del desayuno | | | | | |  |
| n |  | Nada saludable | | Poco saludable | | Saludable | | | Muy saludable | *Media | **Dt | X2 | Estadístico | Correl.  Pearson |
| Tiempo de práctica  de AF semanal | | Nada | 185 |  | 3,8% | | 16,2% | | 31,4% | | | 48,6% | 2,25 | 1,43 | 0,186 | Anova  1 factor  p<0,05 | ***0,06  p>0,01 |
| Menos de 1 hora | 190 | 1,1% | | 17,9% | | 37,4% | | | 43,7% | 2,24 |
| De 1 a 2 horas | 293 | 2,4% | | 13,3% | | 36,9% | | | 47,4% | 2,29 |
| De 2 a 3 horas | 169 | 2,4% | | 8,3% | | 34,9% | | | 54,4% | 2,41 |
| Más de 3 horas | 360 | 1,7% | | 11,4% | | 35,8% | | | 51,1% | 2,36 |
| Tiempo de  Actividades  Culturales  Semanal | | Nada | 460 |  | 2,4% | | 15,7% | | 34,3% | | | 47,6% | 2,27 | 1,33 | 0,462 | Anova  1 factor  p<0,05 | ***0,07  p>0,01 |
| Menos de 1 hora | 271 | 2,6% | | 14,0% | | 35,4% | | | 48,0% | 2,29 |
| De 1 a 2 horas | 241 | 2,1% | | 11,6% | | 36,9% | | | 49,4% | 2,34 |
| De 2 a 3 horas | 100 | 1,0% | | 13,0% | | 32,0% | | | 54,0% | 2,39 |
| Más de 3 horas | 125 | 1,6% | | 5,6% | | 40,0% | | | 52,8% | 2,44 |
| Tiempo dedicado a  Nuevas Tecnologías | | Nada | 241 |  | 2,9% | | 9,1% | | 36,1% | | | 51,9% | 2,37 | 1,22 | 0,330 | Anova  1 factor  p>0,05 | -0,05  p>0,05 |
| Menos de 1 hora | 345 | 2,0% | | 14,5% | | 32,8% | | | 50,7% | 2,32 |
| De 1 a 2 horas | 339 | 1,2% | | 13,9% | | 37,8% | | | 47,2% | 2,31 |
| De 2 a 3 horas | 148 | 3,4% | | 11,5% | | 33,1% | | | 52,0% | 2,34 |
| Más de 3 horas | 124 | 2,4% | | 17,7% | | 38,7% | | | 41,1% | 2,19 |
| Tiempo con  amigos | | Nada1 | 400 |  | 1,5% | | 11,0% | | 36,8% | | | 50,8% | 2,37 | 1,43 | 0,001 | Anova  1 factor  p<0,05 | ***-0,12  p>0,01 |
| Menos de 1 hora1 | 288 | 2,8% | | 10,8% | | 29,9% | | | 56,6% | 2,40 |
| De 1 a 2 horas1 | 205 | 1,5% | | 13,7% | | 33,7% | | | 51,2% | 2,35 |
| De 2 a 3 horas | 114 |  | | 16,7% | | 39,5% | | | 43,9% | 2,27 |
| Más de 3 horas2 | 190 | 4,7% | | 18,9% | | 41,1% | | | 35,3% | 2,07 |
| Tiempo ver televisión | | Nada | 34 |  | 2,9% | | 2,9% | | 35,3% | | | 58,8% | 2,5 | 1,02 | 0,479 | Anova  1 factor  p>0,05 | ***-0,06  p>0,01 |
| Menos de 1 hora | 309 | 1,3% | | 13,3% | | 31,7% | | | 53,7% | 2,38 |
| De 1 a 2 horas | 483 | 1,9% | | 12,8% | | 38,1% | | | 47,2% | 2,31 |
| De 2 a 3 horas | 223 | 3,1% | | 14,3% | | 35,9% | | | 46,6% | 2,26 |
| Más de 3 horas | 148 | 3,4% | | 14,9% | | 34,5% | | | 47,3% | 2,26 |

* La media se calcula dándole un valor a cada ítem del tipo de desayuno: 0 Nada saludable; 1 Poco saludable; 2 Saludable; 3 Muy saludable

** Dt: Desviación típica o estándar

*** La correlación es significativa al nivel 0,01

1-2 Diferencias signficativas (post hoc)

**ANEXO III**

| **Relación: Conocimiento de la calidad del desayuno / Variables relacionadas con el descanso** | | | | | | | | | | | | | |
| --- | --- | --- | --- | --- | --- | --- | --- | --- | --- | --- | --- | --- | --- |
|  | |  |  |  | | Conocimiento sobre calidad del desayuno | | | | | | |  |
| n |  | Nada saludable | Poco saludable | | Saludable | Muy saludable | *Media | **Dt | X2 | Estadístico | Correl  Pearson |
| Tiempo dormir | Menos de 6 horas | 38 |  | 5,3% | 26,3% | | 28,9% | 39,5% | 2,03 | 1,04 | 0,027 | Anova  1 factor  p<0,05 | 0,03  p>0,01 |
| De 6 a 7 horas | 119 | ,8% | 16,8% | | 37,0% | 45,4% | 2,27 |
| De 7 a 8 horas | 357 | 1,1% | 13,4% | | 38,4% | 47,1% | 2,31 |
| De 8 a 9 horas | 397 | 2,3% | 9,3% | | 34,8% | 53,7% | 2,40 |
| Más de 9 horas | 286 | 3,5% | 15,0% | | 33,2% | 48,3% | 2,26 |
| Hora de acosarse | Antes de las 9 | 53 |  | 5,7% | 18,9% | | 34,0% | 41,5% | 2,11 | 0,93 | 0,593 | Anova  1 factor  p>0,05 | 0,02  p>0,01 |
| Entre 9 y 10 | 68 | 2,9% | 13,2% | | 38,2% | 45,6% | 2,26 |
| Entre 10 y 11 | 444 | 2,0% | 12,8% | | 33,3% | 51,8% | 2,35 |
| Entre 11 y 12 | 482 | 2,3% | 12,0% | | 36,9% | 48,8% | 2,32 |
| Después de las 12 | 150 | ,7% | 16,0% | | 36,7% | 46,7% | 2,29 |
| Descansa suficiente | No | 266 |  | 1,9% | 16,2% | | 38,3% | 43,6% | 2,24 | 0,41 | 0,151 | T Student  p>0,05 | 0,05  p>0,01 |
| Sí | 931 | 2,3% | 12,4% | | 34,7% | 50,7% | 2,34 |

* La media se calcula dándole un valor a cada ítem del tipo de desayuno: 0 Nada saludable; 1 Poco saludable; 2 Saludable; 3 Muy saludable

** Dt: Desviación típica o estándar

*** La correlación es significativa al nivel 0,01

**ANEXO IV**

|  | **Relación: Conocimiento de la calidad del desayuno / Variables relacionadas con la composición corporal** | | | | | | | | | | | | | |
| --- | --- | --- | --- | --- | --- | --- | --- | --- | --- | --- | --- | --- | --- | --- |
|  | | |  |  |  | | Conocimiento sobre calidad del desayuno | | | | | | |  |
| n |  | Nada saludable | Poco saludable | | Saludable | Muy saludable | *Media | **Dt | X2 | Estadístico | Correl Pearson |
| Percentil IMC | | <3 | 13 |  |  | 7,7% | | 23,1% | 69,2% | 2,62 | 0,87 | 0,127 | Anova  1 factor  p<0,05 | ***-0,08  p>0,01 |
| 3 – 50 | 484 | 1,7% | 12,6% | | 32,0% | 53,7% | 2,38 |
| 50 – 85 | 462 | 3,0% | 11,7% | | 38,1% | 47,2% | 2,29 |
| 85 – 97 | 176 | 1,7% | 16,5% | | 39,2% | 42,6% | 2,23 |
| >97 | 62 | 1,6% | 21,0% | | 35,5% | 41,9% | 2,18 |
| Están contentos  con su peso | | No, creo que me falta | 154 |  | 2,6% | 14,9% | | 35,1% | 47,4% | 2,27 | 0,61 | 0,133 | Anova  1 factor  p>0,05 | -0,03  p>0,05 |
| Sí, estoy contento | 722 | 1,9% | 12,2% | | 33,4% | 52,5% | 2,36 |
| No, creo que me sobra | 321 | 2,5% | 14,6% | | 40,5% | 42,4% | 2,23 |
| Han hecho dieta  alguna vez en la vida | | No | 880 |  | 1,9% | 11,4% | | 34,1% | 52,6% | 2,37 | 0,44 | 0,001 | T Student  p<0,05 | ***-0,12  p>0,01 |
| Sí | 317 | 2,8% | 18,3% | | 39,4% | 39,4% | 2,15 |

* La media se calcula dándole un valor a cada ítem del tipo de desayuno: 0 Nada saludable; 1 Poco saludable; 2 Saludable; 3 Muy saludable

** Dt: Desviación típica o estándar

*** La correlación es significativa al nivel 0,01

**ANEXO V**

|  | **Relación: Conocimiento de la calidad del desayuno / Variables relacionadas con la alimentación** | | | | | | | | | | | | | |
| --- | --- | --- | --- | --- | --- | --- | --- | --- | --- | --- | --- | --- | --- | --- |
|  | | |  |  |  | Conocimiento sobre calidad del desayuno | | | | | | | |  |
| n | **Dt | Nada saludable | | Poco saludable | Saludable | Muy saludable | *Media | **Dt | X2 | Estadístico | Correl Pearson |
| Nº de veces  que comen al día | | 2 ó menos1 | 70 | 0,93 | 2,9% | | 21,4% | 45,7% | 30,0% | 2,03 | 0,93 | 0,001 | Anova  1 factor  p<0,05 | ***0,09  p>0,01 |
| 3 | 340 | 2,4% | | 15,3% | 35,6% | 46,8% | 2,27 |
| 42 | 490 | 1,8% | | 13,1% | 35,7% | 49,4% | 2,33 |
| 52 | 251 | 1,2% | | 8,4% | 32,3% | 58,2% | 2,47 |
| 6 ó mas | 46 | 8,7% | | 13,0% | 34,8% | 43,5% | 2,13 |
| Tiempo dedicado  al desayuno | | No desayuno1 | 134 | 0,65 | 1,5% | | 17,9% | 42,5% | 38,1% | 2,17 | 0,65 | 0,017 | Anova  1 factor  p<0,05 | ***0,10  p>0,01 |
| Menos de 10 min.1 | 744 | 2,7% | | 14,4% | 34,5% | 48,4% | 2,29 |
| 10-20 min.2 | 288 | 1,4% | | 8,0% | 35,4% | 55,2% | 2,44 |
| Mas de 20 min. | 31 |  | | 12,9% | 29,0% | 58,1% | 2,45 |
| Cuánta fruta creen  que deberían  tomar | | Nada de fruta | 30 | 1,48 | 6,7% | | 13,3% | 30,0% | 50,0% | 2,23 | 1,48 | 0,003 | Anova  1 factor  p<0,05 | ***0,12  p>0,01 |
| 1-3 piezas fruta/sem1 | 171 | 3,5% | | 18,7% | 40,4% | 37,4% | 2,12 |
| 4-6 piezas fruta/sem | 254 | 2,4% | | 16,1% | 37,0% | 44,5% | 2,24 |
| 1 pieza de fruta al dia | 186 | 2,2% | | 9,1% | 41,9% | 46,8% | 2,33 |
| 2 piezas de fruta al dia2 | 261 | ,4% | | 11,9% | 31,8% | 55,9% | 2,43 |
| 3 o más piezas fruta/día2 | 295 | 2,4% | | 11,2% | 31,2% | 55,3% | 2,39 |
| Cuánta verdura  creen que  deberían tomar | | Nada de verdura | 69 | 1,64 | 8,7% | | 17,4% | 26,1% | 47,8% | 2,13 | 1,64 | 0,007 | Anova  1 factor  p>0,05 | ***0,05  p>0,01 |
| 1-3 raciones | 393 | 2,0% | | 14,8% | 38,4% | 44,8% | 2,26 |
| 4-6 raciones | 258 | ,8% | | 9,7% | 40,7% | 48,8% | 2,38 |
| 1 racion | 224 | 2,2% | | 12,9% | 30,4% | 54,5% | 2,37 |
| 2 raciones | 112 | ,9% | | 14,3% | 34,8% | 50,0% | 2,34 |
| 3 raciones | 75 | 4,0% | | 12,0% | 38,7% | 45,3% | 2,25 |
| 4 raciones | 30 |  | | 16,7% | 13,3% | 70,0% | 2,53 |
| 5 o más raciones | 36 | 2,8% | | 11,1% | 30,6% | 55,6% | 2,39 |

* La media se calcula dándole un valor a cada ítem del tipo de desayuno: 0 Nada saludable; 1 Poco saludable; 2 Saludable; 3 Muy saludable

** Dt: Desviación típica o estándar

*** La correlación es significativa al nivel 0,01

1-2 Diferencias signficativas (post hoc)
